# Supplementary material
Source: PubMed Central journal article supplement (PMC10767353)
Supplement: ajcr0013-6280-f1.pdf [file ajcr0013-6280-f1.pdf]

## Stem cell markers and breast cancer

**Supplementary Table 1.** Distribution of stem cell markers in normal terminal duct-lobular units by case-control status and benign breast disease subtype (mean [SD] and range)

| Stem cell marker expression | BBD subtype                |                                          |                                      | Cases                     |                                         |                                      | Controls                   |                                          |                                      |
|-----------------------------|----------------------------|------------------------------------------|--------------------------------------|---------------------------|-----------------------------------------|--------------------------------------|----------------------------|------------------------------------------|--------------------------------------|
|                             | Non-proliferative<br>n=141 | Proliferative<br>without atypia<br>n=257 | Proliferative<br>with atypia<br>n=78 | Non-proliferative<br>n=24 | Proliferative<br>without atypia<br>n=48 | Proliferative<br>with atypia<br>n=29 | Non-proliferative<br>n=117 | Proliferative<br>without atypia<br>n=209 | Proliferative<br>with atypia<br>n=29 |
| CD44 stroma                 | 18.6 (28.5)<br>0-96.2      | 17.4 (27.4)<br>0-94.9                    | 21.2 (27.7)<br>0-93.8                | 14.3 (26.9)<br>0-80.8     | 16.5 (28.1)<br>0-90.5                   | 17.6 (28.2)<br>0-93.6                | 19.5 (28.9)<br>0-96.2      | 17.6 (37.3)<br>0-94.9                    | 23.5 (27.5)<br>0-94.8                |
| CD44 epithelium             | 27.4 (37.4)<br>0-100       | 38.4 (35.9)<br>0-100                     | 49.0 (33.1)<br>0.9-100               | 30.5 (36.1)<br>0-98.9     | 35.6 (33.6)<br>0-98.8                   | 42.8 (32.5)<br>0.9-100               | 39.0 (37.6)<br>0-100.0     | 39.1 (36.5)<br>0-100.0                   | 52.9 (33.3)<br>1.1-99.8              |
| CD44 stroma + epithelium    | 27.0 (32.1)<br>0-98.6      | 25.8 (30.4)<br>0-99.1                    | 32.4 (30.0)<br>0.2-96.7              | 21.2 (30.5)<br>0-91.3     | 25.3 (29.8)<br>0-92.5                   | 27.4 (29.1)<br>0.4-96.7              | 28.3 (32.5)<br>0-98.6      | 22.9 (30.6)<br>0-99.1                    | 35.5 (30.5)<br>0.2-96.7              |
| CD24 stroma                 | 6.9 (12.8)<br>0-63.5       | 8.4 (13.4)<br>0-83.6                     | 12.2 (15.6)<br>0-73.0                | 5.4 (8.5)<br>0-37.1       | 5.7 (8.8)<br>0-46.2                     | 10.9 (12.7)<br>0-42.3                | 7.2 (13.6)<br>0-63.5       | 9.1 (14.2)<br>0-83.6                     | 13.1 (17.3)<br>0-73.0                |
| CD24 epithelium             | 28.0 (22.6)<br>0.5-98.1    | 28.2 (23.1)<br>0-97.6                    | 33.5 (23.0)<br>0.7-82.5              | 27.8 (23.3)<br>0.5-85.4   | 25.5 (20.8)<br>0-87.9                   | 32.8 (23.1)<br>4.4-78.8              | 28.0 (22.5)<br>1.7-98.1    | 28.9 (23.6)<br>0-97.6                    | 33.9 (23.3)<br>0.7-82.5              |
| CD24 stroma + epithelium    | 17.4 (16.9)<br>0.2-91.6    | 18.3 (17.7)<br>0-93.2                    | 22.8 (17.8)<br>0-74.1                | 16.3 (14.7)<br>0.2-64.4   | 16.4 (14.6)<br>0.3-63.2                 | 20.9 (15.2)<br>0-49.7                | 17.7 (17.4)<br>0.2-91.6    | 18.7 (18.4)<br>0-93.2                    | 23.9 (19.3)<br>0.8-74.1              |
| ALDH1A1 stroma              | 11.1 (12.0)<br>0-85.0      | 10.4 (12.0)<br>0-67.2                    | 17.3 (17.8)<br>0-64.6                | 7.1 (8.6)<br>0-34.5       | 12.4 (14.3)<br>0-67.2                   | 12.9 (16.1)<br>0.5-64.6              | 11.9 (14.2)<br>0-85.0      | 9.9 (11.4)<br>0-56.8                     | 20.0 (18.4)<br>0-64.6                |
| ALDH1A1 epithelium          | 28.0 (21.1)<br>0.5-90.8    | 26.0 (19.3)<br>0.5-93.4                  | 28.4 (17.1)<br>0.9-67.9              | 24.5 (26.2)<br>2.2-85.1   | 27.8 (19.6)<br>0.7-85.5                 | 28.6 (18.8)<br>0.9-67.9              | 28.8 (20.0)<br>0.5-90.8    | 25.5 (19.3)<br>0.5-93.4                  | 28.3 (16.2)<br>1.6-59.5              |
| ALDH1A1 stroma + epithelium | 21.0 (15.9)<br>0.4-88.5    | 19.5 (14.2)<br>1.0-70.1                  | 23.9 (15.1)<br>1.1-56.8              | 17.4 (17.5)<br>1.8-62.3   | 21.7 (14.7)<br>1.0-70.1                 | 21.7 (14.4)<br>1.1-55.4              | 21.7 (15.5)<br>0.4-88.5    | 18.9 (14.1)<br>1.2-67.0                  | 25.1 (15.6)<br>1.3-56.8              |

Abbreviations: BBD, benign breast disease; SD, standard deviation.

## Stem cell markers and breast cancer

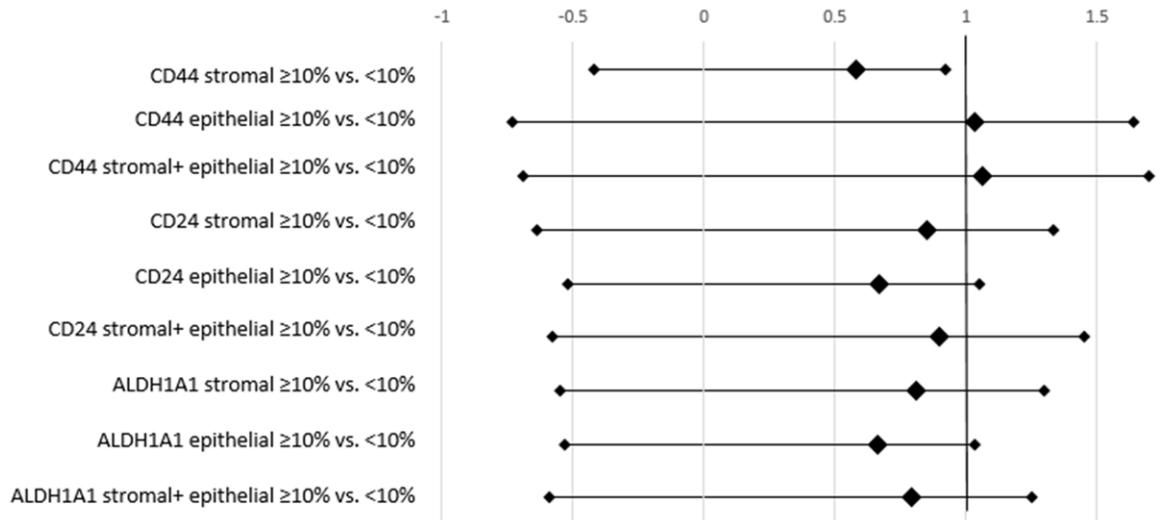

**Supplementary Figure 1.** Associations of binary stem cell marker expression with subsequent breast cancer risk (ORs and 95% CI).

**Supplementary Table 2.** Associations of stem cell markers in normal terminal duct-lobular units with subsequent breast cancer risk, adjusted for benign breast disease subtype (odds ratios and 95% confidence intervals)<sup>a</sup>

| Stem cell marker expression  | CD44             |                   | CD24             |                   | ALDH1A1          |                   |
|------------------------------|------------------|-------------------|------------------|-------------------|------------------|-------------------|
|                              | N cases/controls | OR (95% CI)       | N cases/controls | OR (95% CI)       | N cases/controls | OR (95% CI)       |
| <b>Stroma</b>                |                  |                   |                  |                   |                  |                   |
| Continuous, per 10% increase | 94/394           | 0.95 (0.86; 1.04) | 95/333           | 0.83 (0.67; 1.03) | 90/350           | 0.87 (0.72; 1.07) |
| <10%                         | 67/197           | Ref               | 71/248           | Ref               | 59/191           | Ref               |
| $\geq 10\%$                  | 27/127           | 0.53 (0.31; 0.93) | 24/85            | 0.69 (0.39; 1.25) | 31/124           | 0.74 (0.44; 1.26) |
| 0-10%                        | 67/197           | Ref               | 71/249           | Ref               | 59/191           | Ref               |
| >10-50%                      | 13/76            | 0.40 (0.19; 0.83) | 24/67            | 0.90 (0.49; 1.65) | 29/114           | 0.81 (0.47; 1.38) |
| >50%                         | 14/51            | 0.74 (0.36; 1.52) | 0/17             | NE                | 2/10             | 0.27 (0.04; 1.74) |
| p-trend                      |                  | 0.25              |                  | 0.04              |                  | 0.12              |
| <b>Epithelium</b>            |                  |                   |                  |                   |                  |                   |
| Continuous, per 10% increase | 91/300           | 0.95 (0.88; 1.02) | 92/312           | 0.95 (0.85; 1.07) | 90/299           | 1.02 (0.90; 1.17) |
| <10%                         | 30/93            | Ref               | 26/63            | Ref               | 26/67            | Ref               |
| $\geq 10\%$                  | 61/207           | 0.94 (0.55; 1.62) | 66/249           | 0.62 (0.35; 1.11) | 64/232           | 0.63 (0.35; 1.13) |
| 0-10%                        | 30/93            | Ref               | 26/63            | Ref               | 26/67            | Ref               |
| >10-50%                      | 35/96            | 1.29 (0.70; 2.39) | 48/188           | 0.63 (0.34; 1.15) | 52/196           | 0.59 (0.32; 1.09) |
| >50%                         | 26/111           | 0.66 (0.34; 1.27) | 18/61            | 0.59 (0.27; 1.29) | 12/36            | 0.85 (0.35; 2.04) |
| p-trend                      |                  | 0.11              |                  | 0.28              |                  | 0.67              |
| <b>Stroma + epithelial</b>   |                  |                   |                  |                   |                  |                   |
| Continuous, per 10% change   | 94/325           | 0.95 (0.88; 1.04) | 93/335           | 0.92 (0.79; 1.07) | 96/326           | 0.98 (0.83; 1.16) |
| <10%                         | 43/144           | Ref               | 38/129           | Ref               | 29/90            | Ref               |
| $\geq 10\%$                  | 51/181           | 0.96 (0.58; 1.61) | 58/206           | 0.83 (0.50; 1.38) | 67/236           | 0.77 (0.44; 1.35) |
| 0-10%                        | 44/144           | Ref               | 38/129           | Ref               | 29/91            | Ref               |
| >10-50%                      | 28/99            | 1.05 (0.58; 1.90) | 56/177           | 0.95 (0.56; 1.58) | 64/220           | 0.80 (0.46; 1.40) |
| >50%                         | 22/82            | 0.78 (0.41; 1.48) | 2/29             | 0.18 (0.04; 0.85) | 3/15             | 0.54 (0.13; 2.20) |
| p-trend                      |                  | 0.42              |                  | 0.03              |                  | 0.32              |

Abbreviations: CI, confidence interval; OR, odds ratio; NE, not estimable. <sup>a</sup>Adjusted for age (continuous), BMI (continuous), a family history of breast cancer (Yes/No), menopausal status/postmenopausal hormone use (premenopausal, postmenopausal/no hormones, postmenopausal/past hormones, postmenopausal/current hormones, postmenopausal/unknown hormone use status, unknown menopausal status), age at menarche (<12, 12, 13, >13, unknown), combined parity/age at first birth (parous with first birth before age 25, parous with first birth at or after age 25, nulliparous, unknown), alcohol use (none, >0-<5,  $\geq 5$  g/day), BBD subtype (non-proliferative, proliferative without atypia, and proliferative with atypia), and NHS cohort.

## Stem cell markers and breast cancer

**Supplementary Table 3.** Associations of stem cell markers in normal terminal duct-lobular units with subsequent breast cancer risk, adjusted for percent breast density (odds ratios and 95% confidence intervals)<sup>a</sup>

| Stem cell marker expression  | CD44                 |                   |              | CD24                 |                   |                | ALDH1A1              |                    |               |
|------------------------------|----------------------|-------------------|--------------|----------------------|-------------------|----------------|----------------------|--------------------|---------------|
|                              | N cases/<br>controls | OR (95% CI)       | % mediated   | N cases/<br>controls | OR (95% CI)       | % mediated     | N cases/<br>controls | OR (95% CI)        | % mediated    |
| <b>Stroma</b>                |                      |                   |              |                      |                   |                |                      |                    |               |
| Continuous, per 10% increase | 20/137               | 0.82 (0.64; 1.06) | Not mediated | 20/143               | 0.80 (0.48; 1.33) | 6.4% (P=0.28)  | 19/138               | 0.76 (0.45; 1.31)  | Not mediated  |
| <10%                         | 16/77                | Ref               |              | 15/112               | Ref               |                | 11/84                | Ref                |               |
| ≥10%                         | 4/60                 | 0.20 (0.05; 0.86) |              | 5/31                 | 1.09 (0.29; 4.12) |                | 8/54                 | 1.14 (0.38; 3.44)  |               |
| 0-10%                        | 16/77                | Ref               |              | 15/112               | Ref               |                | 11/84                | Ref                |               |
| >10-50%                      | 1/35                 | 0.11 (0.01; 1.04) |              | 5/26                 | 1.39 (0.37; 5.27) |                | 8/50                 | 1.18 (0.39; 3.59)  |               |
| >50%                         | 3/25                 | 0.35 (0.06; 2.08) |              | 0/54                 | NE                |                | 0/4                  | NE                 |               |
| p-trend                      |                      | 0.12              |              |                      | 0.40              |                |                      | 0.91               |               |
| <b>Epithelium</b>            |                      |                   |              |                      |                   |                |                      |                    |               |
| Continuous, per 10% increase | 19/129               | 0.85 (0.71; 1.01) | Not mediated | 20/136               | 1.04 (0.78; 1.38) | Not mediated   | 20/130               | 1.32 (1.00; 1.75)  | 3.5% (P=0.29) |
| <10%                         | 7/38                 | Ref               |              | 4/17                 | Ref               |                | 2/32                 | Ref                |               |
| ≥10%                         | 12/91                | 0.46 (0.14; 1.53) |              | 16/119               | 0.27 (0.06; 1.29) |                | 18/98                | 2.74 (0.51; 14.78) |               |
| 0-10%                        | 7/38                 | Ref               |              | 4/17                 | Ref               |                | 2/32                 | Ref                |               |
| >10-50%                      | 7/37                 | 0.74 (0.19; 2.97) |              | 11/97                | 0.23 (0.05; 1.15) |                | 14/84                | 2.43 (0.44; 13.49) |               |
| >50%                         | 5/54                 | 0.28 (0.06; 1.26) |              | 5/22                 | 0.54 (0.08; 3.78) |                | 4/14                 | 6.19 (0.67; 57.49) |               |
| p-trend                      |                      | 0.09              |              |                      | 0.80              |                |                      | 0.11               |               |
| <b>Stroma + epithelial</b>   |                      |                   |              |                      |                   |                |                      |                    |               |
| Continuous, per 10% change   | 20/137               | 0.82 (0.66; 1.03) | Not mediated | 21/144               | 0.94 (0.66; 1.34) | 30.7% (P=0.21) | 21/139               | 1.23 (0.83; 1.82)  | 7.7% (P=0.23) |
| <10%                         | 12/53                | Ref               |              | 7/46                 | Ref               |                | 3/39                 | Ref                |               |
| ≥10%                         | 8/84                 | 0.32 (0.11; 1.01) |              | 14/98                | 0.70 (0.22; 2.22) |                | 18/100               | 1.97 (0.47; 8.27)  |               |
| 0-10%                        | 12/53                | Ref               |              | 7/46                 | Ref               |                | 3/40                 | Ref                |               |
| >10-50%                      | 4/44                 | 0.35 (0.09; 1.38) |              | 13/88                | 0.77 (0.24; 2.43) |                | 18/93                | 2.12 (0.51; 8.93)  |               |
| >50%                         | 4/40                 | 0.30 (0.07; 1.40) |              | 1/10                 | NE                |                | 0/6                  | NE                 |               |
| p-trend                      |                      | 0.12              |              |                      | 0.18              |                |                      | 0.69               |               |

Abbreviations: CI, confidence interval; OR, odds ratio; NE, not estimable. <sup>a</sup>Adjusted for age (continuous), BMI (continuous), a family history of breast cancer (Yes/No), menopausal status/postmenopausal hormone use (premenopausal, postmenopausal/no hormones, postmenopausal/past hormones, postmenopausal/current hormones, postmenopausal/unknown hormone use status, unknown menopausal status), age at menarche (<12, 12, 13, >13, unknown), combined parity/age at first birth (parous with first birth before age 25, parous with first birth at or after age 25, nulliparous, unknown), alcohol use (none, >0-<5, ≥5 g/day), percent breast density (continuous), and NHS cohort.
